# Supplementary material for: Solar-light-driven photocatalytic production of peroxydisulfate over noble-metal loaded WO3
Source: Royal Society of Chemistry journal article supplement (doi:10.1039/c9cc01061k), 2019-01-01
Supplement: c9cc01061k1.pdf [file c9cc01061k1.pdf]

# Solar-light-driven photocatalytic production of peroxydisulfate over noble-metal loaded WO<sub>3</sub>

Zeai Huang, Yugo Miseki, Kazuhiro Sayama\*

*Advanced Functional Materials Team, Research Center for Photovoltaics (RCPV), National Institute of Advanced Industrial Science and Technology (AIST), Central 5, 1-1-1 Higashi, Tsukuba, Ibaraki, 305-8565 Japan.*

Corresponding author e-mail: [k.sayama@aist.go.jp](mailto:k.sayama@aist.go.jp); Fax: +81-29-861-4760;

Tel: +81-29-861-4760

## **Experimental section**

### **Preparation of noble-metal loaded WO<sub>3</sub>**

An amount corresponding to 1.0 wt% of the noble metal precursor (H<sub>2</sub>PtCl<sub>6</sub>, Pd(NO<sub>3</sub>)<sub>2</sub>, HAuCl<sub>4</sub>, RuCl<sub>3</sub>, or RhCl<sub>3</sub> solution) was added to a mixture of 45 mL ultrapure water and 5 mL methanol. 1.0 g WO<sub>3</sub> (99.99%, Kojundo Chemical Laboratory Co., Ltd) was then added under strong stirring. After 10 min of adsorption-desorption equilibration, an AM 1.5G solar simulator (SAN-EI Electric Co., XES-151S) was started for the photodeposition of the noble metal onto WO<sub>3</sub>. After 2 h of photoirradiation, the stirring was stopped, the mixture was filtered, washed to a natural pH, and dried at 333 K overnight. The other catalysts, H<sub>2</sub>WO<sub>4</sub>,<sup>1</sup> BiVO<sub>4</sub>,<sup>2</sup> and g-C<sub>3</sub>N<sub>4</sub>,<sup>3</sup> were prepared following literature methods. Degussa P25-TiO<sub>2</sub> was purchased from Evonik Company.

### **Characterization**

The WO<sub>3</sub> and noble-metal-loaded WO<sub>3</sub> was characterized using X-ray diffraction (XRD, PANalytical, EMPYREAN), UV–vis diffuse reflectance (UV–vis DR, JASCO V-670 spectrometer equipped with an integrating sphere), X-ray fluorescence spectroscopy (XRF, Rigaku, Supermini200), X-ray photoelectron spectroscopy (XPS, Ulvac-Phi, XPS-1800), scanning probe microscopy (SEM, SHIMADZU, SPM-9700), and scanning transmission electron microscopy (STEM, Hitachi High-Technologies Co., Ltd., HD-2700) with EDX mapping.

### **Photocatalytic reaction test**

50 mg of the photocatalyst was dispersed in 50 mL of a 1.0 M H<sub>2</sub>SO<sub>4</sub> or NaHSO<sub>4</sub> aqueous solution in a 100 mL beaker. 100 mL min<sup>-1</sup> of O<sub>2</sub> was flowed into the mixture under strong stirring, and the beaker was placed in an ice bath to maintain a temperature below 278 K. Prior to photoirradiation, O<sub>2</sub> was flowed for at least 30 min to achieve an

equilibrium of dissolved  $O_2$  and was kept flowing during the reaction. The photoirradiation was then started using an AM 1.5G solar simulator (SAN-EI Electric Co., XES-151S); the intensity of the irradiation was about  $100 \text{ mW cm}^{-2}$ . The recycle test was performed under the same conditions, excepted that the stirring was performed at the first 30 min and stopped before irradiation, the solution was directly replaced by 50 mL of fresh  $1.0 \text{ M H}_2\text{SO}_4$  aqueous solution after 3 h irradiation, then started the next cycle.

The quantum efficiency (QE) of  $S_2O_8^{2-}$  formation at 420 nm was measured using a 300 W Xe lamp with monochromatic light through a bandpass filter (ASAHI SPECTRA Co., MAX-302).

Since the  $S_2O_8^{2-}$  formation is a two-electron process, therefore the QE can be defined as follows (Eq. S1);

$$QE\% = (M(S_2O_8^{2-}) \times 2 \times n) / N \times 100 \quad S1$$

where  $M(S_2O_8^{2-})$ ,  $n$ , and  $N$  denote the amount of  $S_2O_8^{2-}$  formation at 420 nm ( $2.9 \text{ } \mu\text{mol}$ ), the number of molecules per molar ( $6.0 \times 10^{23} \text{ mol}^{-1}$ ), the number of incident photons, respectively.  $N$  was calculated from the listed Eq. S2;

$$N = E_\lambda / E_0 = (E_\lambda \times \lambda) / (h \times c) = (P \times S \times t \times \lambda) / (h \times c) \quad S2$$

whereas,  $E_\lambda$ ,  $E_0$ ,  $P$ ,  $S$ ,  $t$ ,  $\lambda$ ,  $h$ , and  $c$  denote the incident energy, the energy of per photons ( $E_0 = h\nu = hc/\lambda$ ), the intensity of irradiation ( $0.4 \text{ mW cm}^{-2}$ ), the irradiated area ( $10 \text{ cm}^2$ ), the irradiation time (3 h), the wavelength of light (420 nm), Plank constant ( $6.6 \times 10^{-34} \text{ J}\cdot\text{s}$ ), the speed of light ( $3.0 \times 10^8 \text{ m s}^{-1}$ ), respectively.

### Quantitative analysis of products

The total content of the oxidants of  $S_2O_8^{2-}$  and  $H_2O_2$  was first measured by colorimetry using the color change from  $Fe^{2+}$  to  $Fe^{3+}$ , as shown in Eq. S3 and S4, using a microplate reader (Tecan Japan Co., Ltd., infinite M200PRO).

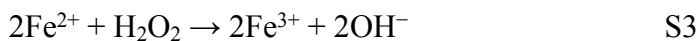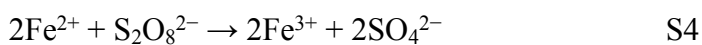

To differentiate the  $H_2O_2$  content from the total oxidant content, the reduction of  $Ce^{4+}$  to

Ce<sup>3+</sup> was used.  $E_0(\text{Ce}^{4+}/\text{Ce}^{3+})$  is 1.61 V, which is higher than  $E_0(\text{O}_2/\text{H}_2\text{O}_2) = 0.68$  V. Therefore, H<sub>2</sub>O<sub>2</sub> can be oxidized by Ce<sup>4+</sup> (Eq. S5); however, S<sub>2</sub>O<sub>8</sub><sup>2-</sup> cannot be oxidized due to its higher oxidation potential.

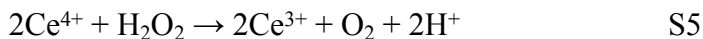

Subsequently, the amount of S<sub>2</sub>O<sub>8</sub><sup>2-</sup> can be calculated from the difference between the two measurements; a similar concept has been reported.<sup>4</sup>

In detail, 1.7 mL 1.0 M H<sub>2</sub>SO<sub>4</sub>, 100 μL reaction solution, and 200 μL 0.01 M FeSO<sub>4</sub> in 1.0 M H<sub>2</sub>SO<sub>4</sub> were mixed together. After 30 min, the solution was measured using Fe<sup>3+</sup> colorimetry at 330 nm. Finally, the total oxidant content could be calculated. To determine the amount of H<sub>2</sub>O<sub>2</sub>, the 0.01 M FeSO<sub>4</sub> was replaced by 0.0025 M Ce(SO<sub>4</sub>)<sub>2</sub> in 1.0 M H<sub>2</sub>SO<sub>4</sub>. After 30 min, the solution was measured using Ce<sup>4+</sup> colorimetry at 360 nm.

### **Electrochemical properties**

The electrochemical performance of noble-metal loaded fluorine doped tin oxide (noble-metal/FTO) was measured using an electrochemical analyzer (BAS. Inc., ALS660B). The noble-metal/FTO electrode was prepared as follows: FTO (2.4 cm × 6 cm) was pretreated in O<sub>3</sub> for 30 min. and loaded with a 0.03 M aqueous solution of the noble-metal precursor by the spin coating method (2000 rpm, 15 s). The electrodes were then calcined at 823 K for 30 min to obtain the noble-metal loaded FTO.

The current-voltage (*I-V*) characteristics were studied with a three-electrode system using a one-compartment cell consisting of noble-metal/FTO as the working electrode, a Ag/AgCl electrode as the reference electrode, and a Pt mesh as the counter electrode at a low scan rate (50 mV s<sup>-1</sup>) in 50 mL of 1.0 M H<sub>2</sub>SO<sub>4</sub> with flowing O<sub>2</sub>.

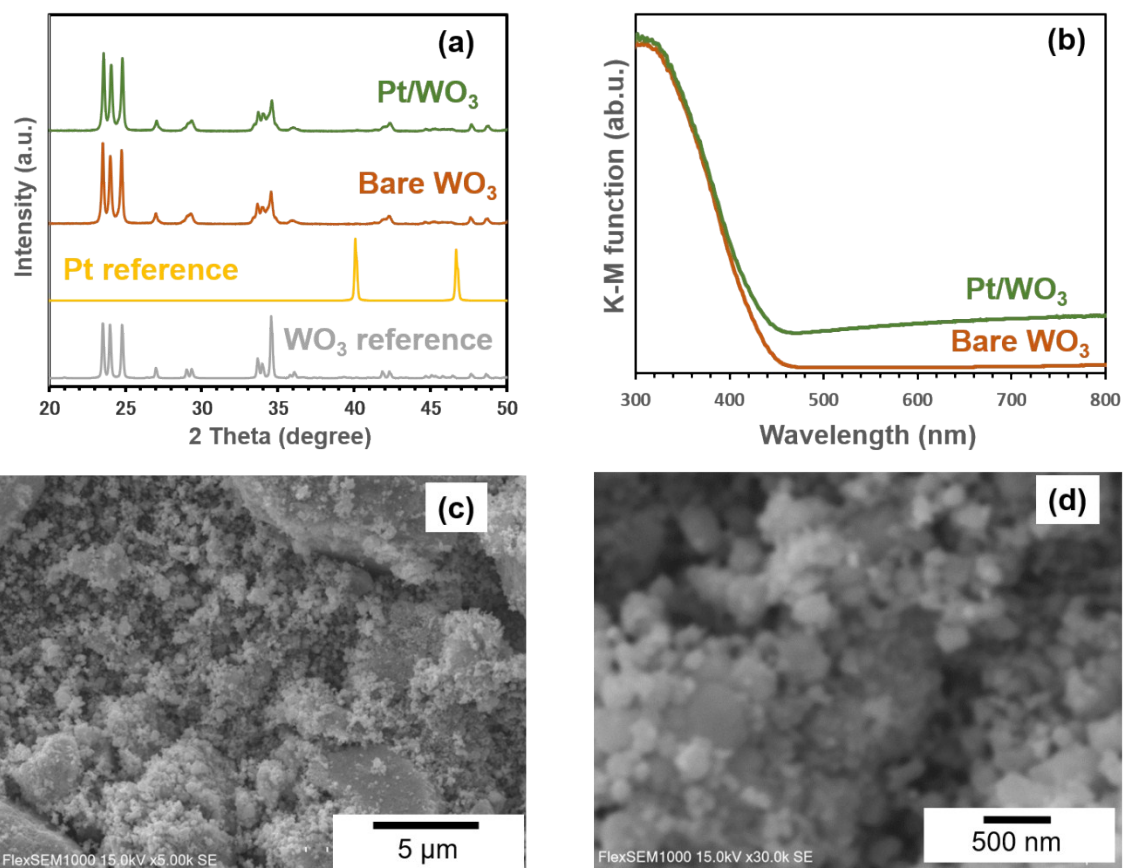

**Figure S1** XRD (a), and UV-vis DR spectra (b) of bare WO<sub>3</sub> and 1.0 wt% Pt loaded WO<sub>3</sub> by a photodeposition method. (c) and (d) are SEM images of 1.0 wt% Pt loaded WO<sub>3</sub>.

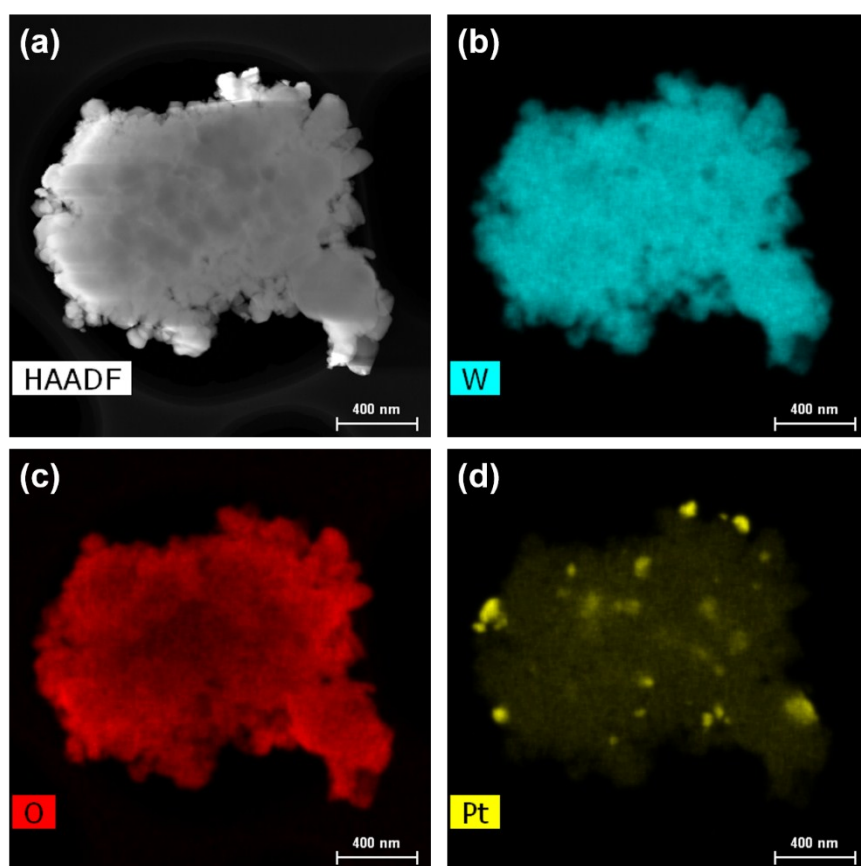

**Figure S2** HAADF image (a) and the related element mapping of W (b), O(c) and Pt (d) of 1.0 wt% Pt/WO<sub>3</sub>.

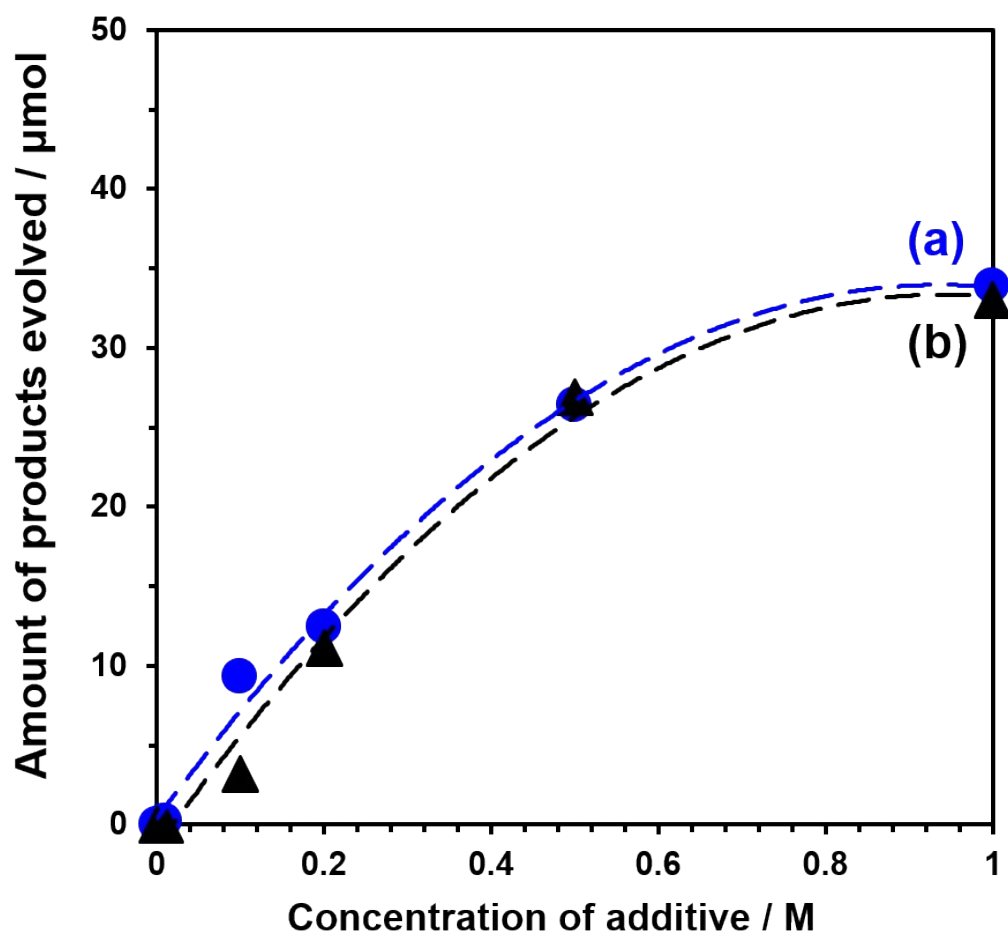

**Figure S3** Effect of concentration of  $\text{H}_2\text{SO}_4$ (a) and  $\text{NaHSO}_4$ (b) on the formation of  $\text{S}_2\text{O}_8^{2-}$  over 1.0 wt%  $\text{Pt}/\text{WO}_3$ .

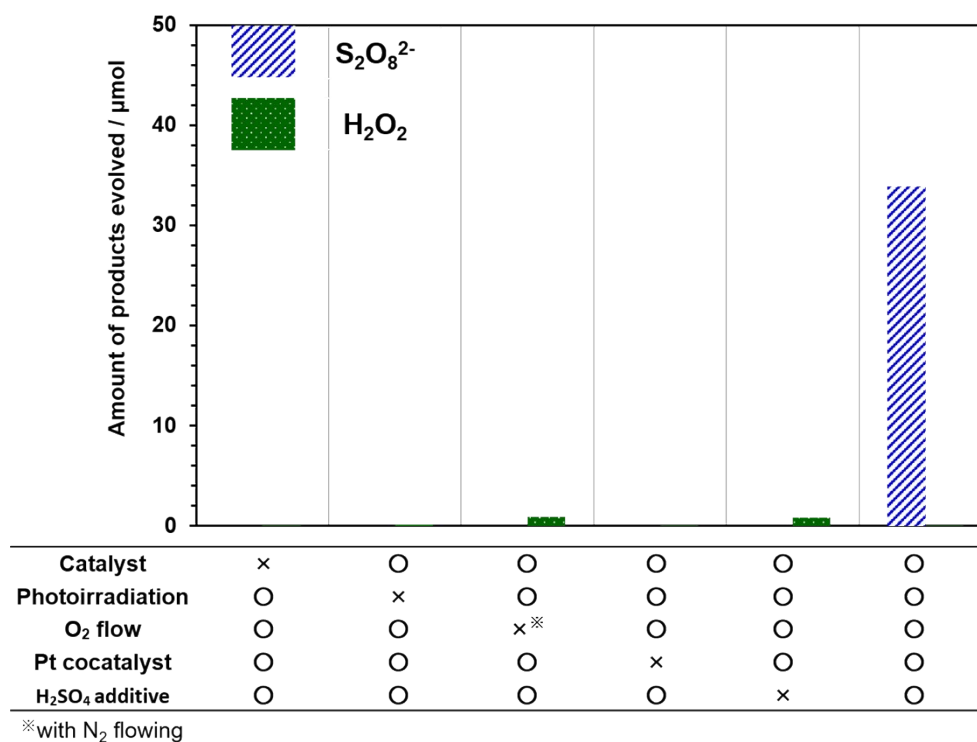

**Figure S4** Formation amounts of products in the absence of each component during the photocatalytic production of over 1.0 wt% Pt loaded  $\text{WO}_3$ .

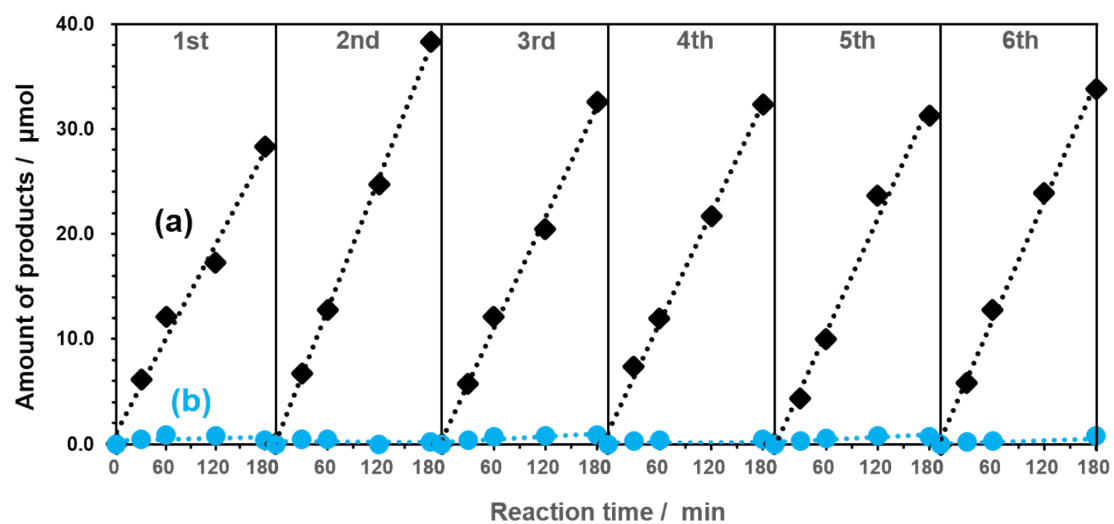

**Figure S5** Time course of  $\text{S}_2\text{O}_8^{2-}$ (a) and  $\text{H}_2\text{O}_2$ (b) formation amount during 6-cycle of 3 h photoirradiation over 1.0 wt% Pt/ $\text{WO}_3$  in 1.0 M  $\text{H}_2\text{SO}_4$  under flowing  $\text{O}_2$ .

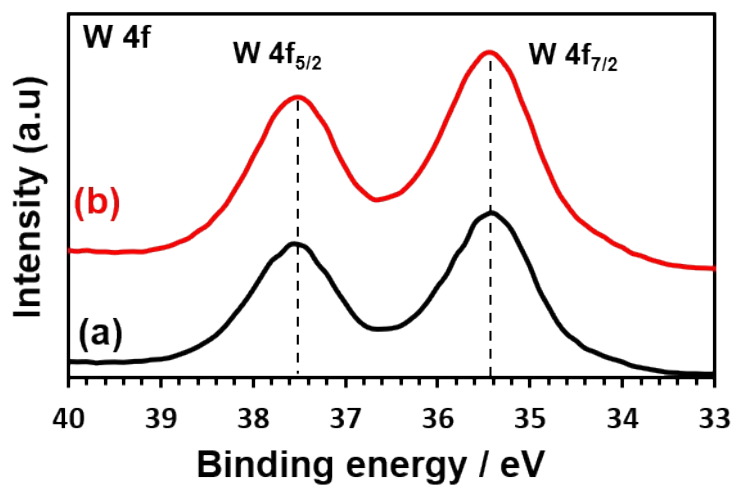

**Figure S6** XPS spectra of as-prepared(a) and after 6-cycle reaction(b) of W 4f in 1.0 wt% Pt/WO<sub>3</sub> photocatalyst.

## References

1. Suzuki, H., Tomita, O., Higashi, M., Abe, R. Tungstic acids  $\text{H}_2\text{WO}_4$  and  $\text{H}_4\text{WO}_5$  as stable photocatalysts for water oxidation under visible light. *Journal of Materials Chemistry A*, **2017**, 5(21), 10280-10288.
2. Iwase, A., Kato, H., Kudo, A. A simple preparation method of visible-light-driven  $\text{BiVO}_4$  photocatalysts from oxide starting materials ( $\text{Bi}_2\text{O}_3$  and  $\text{V}_2\text{O}_5$ ) and their photocatalytic activities. *Journal of Solar Energy Engineering*, **2010**, 132(2), 021106.
3. Maeda, K., Wang, X., Nishihara, Y., Lu, D., Antonietti, M., Domen, K. Photocatalytic activities of graphitic carbon nitride powder for water reduction and oxidation under visible light. *The Journal of Physical Chemistry C*, **2009**, 113(12), 4940-4947.
4. Liang, C., He, B. A titration method for determining individual oxidant concentration in the dual sodium persulfate and hydrogen peroxide oxidation system. *Chemosphere*, **2018**, 198, 297-302.
